# Supplementary material for: Combinatorial discovery of self-color-mixing phosphors Bi4(1−x)Si3O12 : RE4x3+ (RE3+ = Dy3+, Eu3+) for direct white light emission
Source: Royal Society of Chemistry journal article supplement (doi:10.1039/c5ra13159f), 2015-01-01
Supplement: c5ra13159f1.pdf [file c5ra13159f1.pdf]

Fig. S1. A luminescence picture of a  $\text{Bi}_{4(1-x-y)}\text{Si}_3\text{O}_{12}:\text{Ce}^{3+}_{4x}, \text{Lu}^{3+}_{4y}$  library under a UV excitation ( $\lambda_{\text{ex}} = 254 \text{ nm}$ ), recorded by a digital camera; A designed doping composition (x,y) map of the same  $\text{Bi}_{4(1-x-y)}\text{Si}_3\text{O}_{12}:\text{Ce}^{3+}_{4x}, \text{Lu}^{3+}_{4y}$  library (unit: mol %).

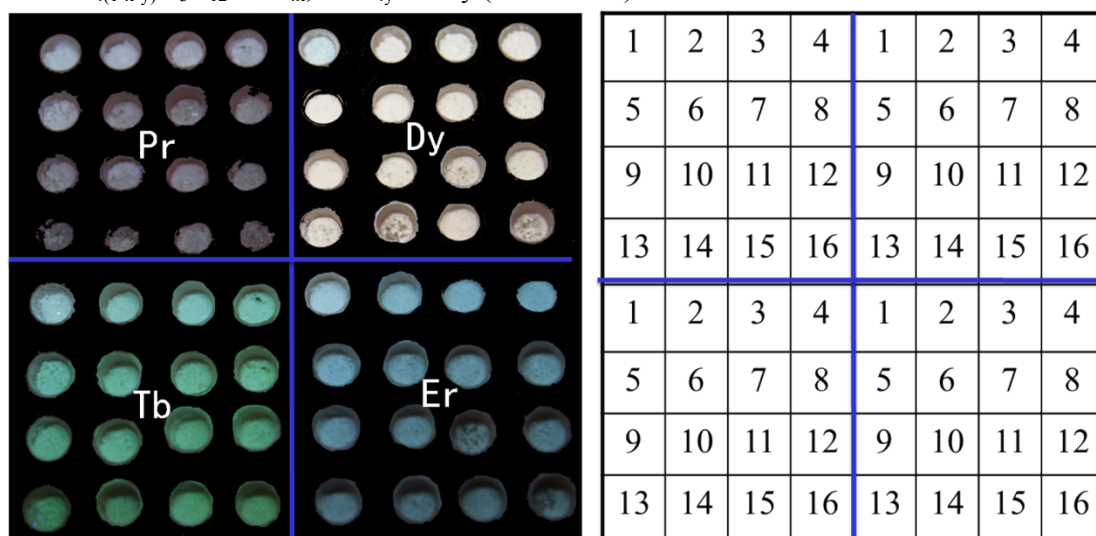

Fig. S1.(left) A luminescence picture of a  $\text{Bi}_{4(1-x)}\text{Si}_3\text{O}_{12}:\text{RE}^{3+}_{4x}$  (RE = Pr, Dy, Tb, Er) library under a UV excitation ( $\lambda_{\text{ex}} = 254 \text{ nm}$ ), recorded by a digital camera; (right) A designed doping composition (x) map of the same  $\text{Bi}_{4(1-x)}\text{Si}_3\text{O}_{12}:\text{RE}^{3+}_{4x}$  (RE = Pr, Dy, Tb, Er) library (unit: mol %).

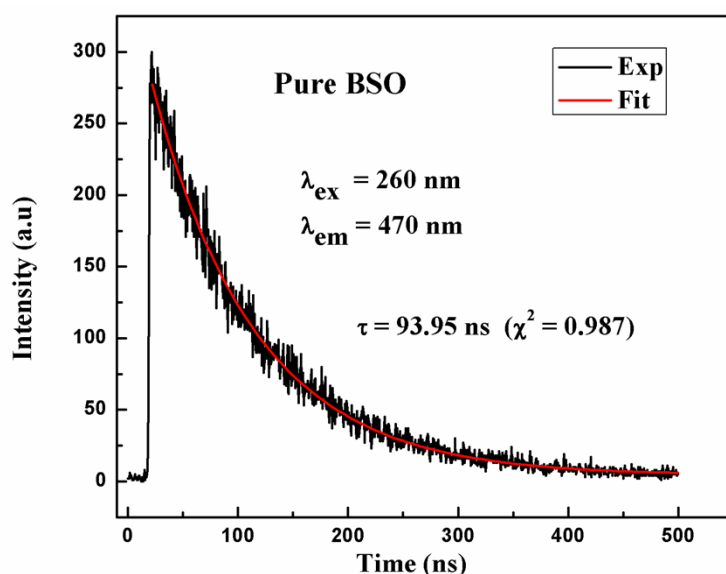

Fig. S2. Decay curves of 460 nm of  $\text{Bi}^{3+}$  emission in  $\text{Bi}_{3.84}\text{Si}_3\text{O}_{12}:\text{Dy}_{0.16}$
